# Supplementary material for: Identification of Sonographic B-lines with Linear Transducer Predicts Elevated B-Type Natriuretic Peptide Level
Source: PubMed Central journal article supplement — West J Emerg Med. 2011 Feb;12(1):102–6. (PMC3088384), 2011-02
Supplement: Appendix_Data_Sheet.pdf [file Appendix_Data_Sheet.pdf]

# Chest Ultrasound Findings in Suspected Congestive Heart Failure – Data Collection Sheet

Study Number: \_\_\_\_\_

Date: \_\_\_\_\_

Resident: \_\_\_\_\_

Attending: \_\_\_\_\_

Age: \_\_\_\_\_ yo Height: \_\_\_\_\_ ft \_\_\_\_\_ in Weight: \_\_\_\_\_ lbs

|                      |
|----------------------|
| <b>Patient Label</b> |
|----------------------|

## Vital Signs:

Highest Temp: \_\_\_\_\_ degrees C or F

Lowest SBP/DBP or MAP: \_\_\_\_\_

Highest HR: \_\_\_\_\_ beats/minute

Highest RR: \_\_\_\_\_ breaths/minute

Lowest SaO<sub>2</sub>: \_\_\_\_\_ \*on: \_\_\_\_\_ liters O<sub>2</sub>

## INITIAL ULTRASOUND

**Sonologist:** Moore      Manson      Carmody      Bonz

### B-line Assessment – Linear Probe, ED ECHO preset, orientation marker towards head

Right mid-axillary       Present       Absent

Right mid-clavicular       Present       Absent

Right mid-clavicular       Present       Absent

Right mid-axillary       Present       Absent

### Quality Assurance:

Date ultrasound reviewed: \_\_\_\_\_ Reviewed By: \_\_\_\_\_

Adequate Study?      YES      NO

Agree with Interpretation?      YES      NO

---

### Following All Data Acquired

#### Labs:

BNP: \_\_\_\_\_ pg/mL
